# Supplementary material for: Preterm Intraventricular Hemorrhage-Induced Inflammatory Response in Human Choroid Plexus Epithelial Cells
Source: MDPI journal article supplement (doi:10.3390/ijms22168648), 2021-08-11
Supplement: s1 [file s1]

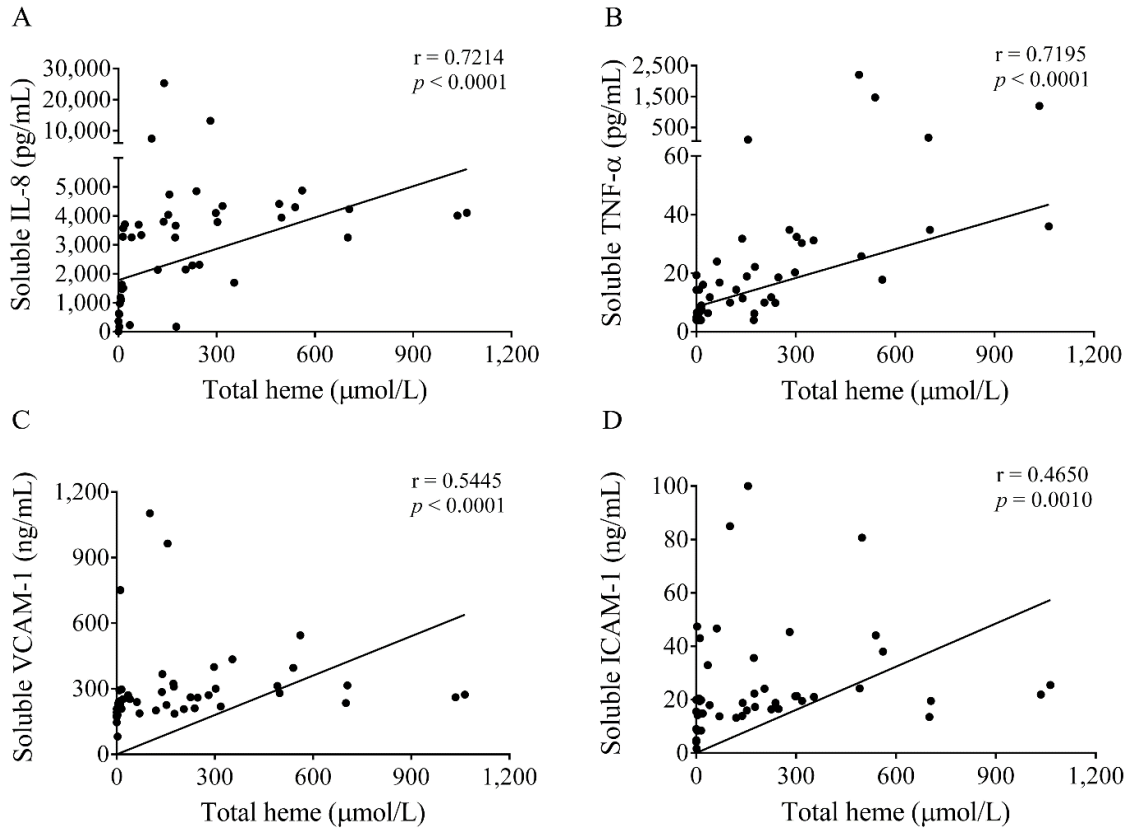

**Figure S1.** Correlation analysis of CSF total heme level with other soluble parameters. Correlations between total heme levels and other soluble parameters measured in IVH CSF samples ( $n = 47$ ) were determined using Spearman's test. Strong correlations were found between total heme levels and soluble IL-8 (A), TNF-α (B), VCAM-1 (C), and ICAM-1 (D) concentrations in CSF samples. CSF: cerebrospinal fluid, ICAM-1: intercellular adhesion molecule 1, IL-8: interleukin-8, IVH: intraventricular hemorrhage, TNF-α: tumor necrosis factor alpha, VCAM-1: vascular cell adhesion molecule 1.
